# Supplementary material
Source: Springer Nature journal article supplement (https://www.springermedizin.de/resource/supplementary/12885_2010_2579_MOESM2_ESM.pdf/9462612)

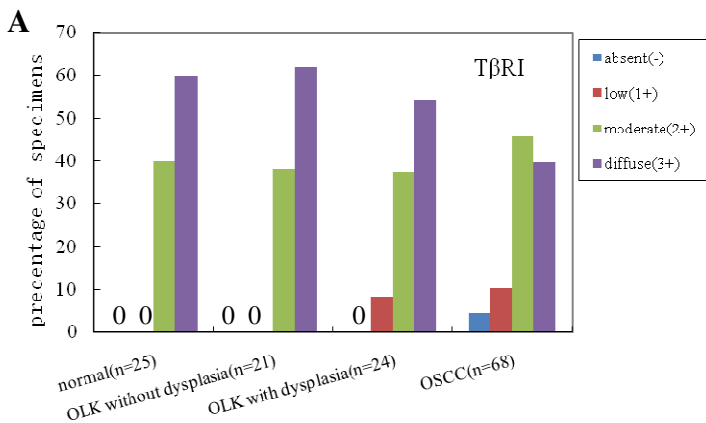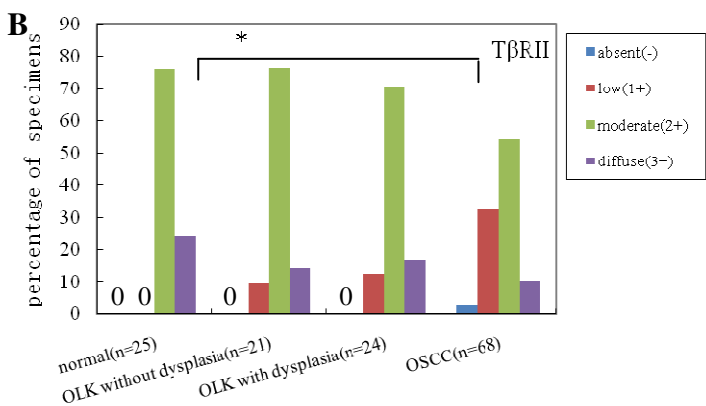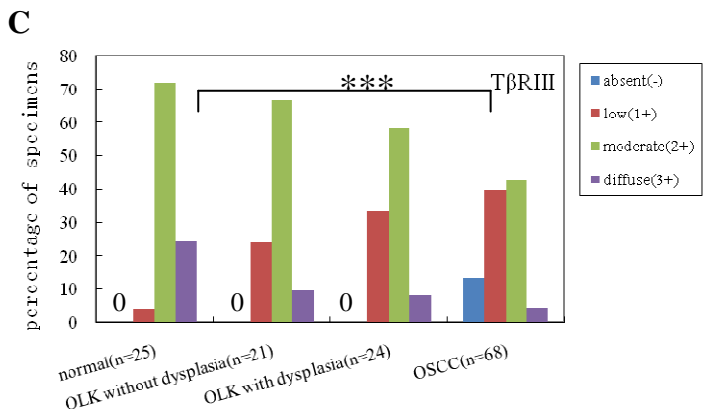

Supplement: MOESM2 [file 9462612]
